# Supplementary material
Source: HighWire-hosted journal article supplement (https://bmjopen.bmj.com/content/7/6/e017000)
Supplement: inline-supplementary-material-1 [file inline-supplementary-material-1.pdf]

**Supplementary material C: Data extraction form**

| Variable                                                                                                | Coding                                                                                                       |
|---------------------------------------------------------------------------------------------------------|--------------------------------------------------------------------------------------------------------------|
| <b>PUBLICATION DETAILS</b>                                                                              |                                                                                                              |
| Authors                                                                                                 | Text entry                                                                                                   |
| Publication date                                                                                        | Numerical entry                                                                                              |
| Publication status                                                                                      | 0 = unpublished; 1 = published                                                                               |
| Publication language                                                                                    | Text entry (to be coded once compiled)                                                                       |
| <b>SAMPLE CHARACTERISTICS</b>                                                                           |                                                                                                              |
| Mean age                                                                                                | Numerical entry                                                                                              |
| Gender composition (% male)                                                                             | Numerical entry                                                                                              |
| Type of sample                                                                                          | 0 = university sample; 1 = community adults; 2 = clinical population; 3 = adolescents/ children              |
| <b>METHODOLOGICAL DETAILS</b>                                                                           |                                                                                                              |
| Time interval (in weeks) between measures of time perspective and measures of self-regulation           | 0 = cross-sectional study; 1 = one week; 2 = two weeks; 3 = three weeks (and so on)                          |
| Country where the study was conducted                                                                   | Text entry (to be coded once compiled)                                                                       |
| Measure of time perspective                                                                             | Text entry (to be coded once compiled)                                                                       |
| Measure(s) of self-regulation                                                                           | Text entry (to be coded once compiled). Please specify all measures reported, if more than one is available. |
| Self-report or objective measure of self-regulation?                                                    | 0 = objective; 1 = self-report                                                                               |
| Reliability of the measure                                                                              | Test-retest or internal reliability                                                                          |
| Domain being studied                                                                                    | 0 = health; 2 = academic; 3 = work; 4 = financial; 5 = environmental                                         |
| <b>STATISTICAL DETAILS</b> (to be duplicated where studies report multiple measures of self-regulation) |                                                                                                              |
| Effect size ( $r$ )                                                                                     | Numerical entry                                                                                              |
| How the effect size was calculated                                                                      | 0 = reported in the manuscript; 1 = author provided on contact; 3 = converted from other data provided       |
| Sample size                                                                                             | Numerical entry                                                                                              |
| <b>CODING</b> (to be duplicated where studies report multiple measures of self-regulation)              |                                                                                                              |
| Self-regulatory process / ability / outcome                                                             | 0 = goal setting; 2 = goal monitoring; 3 = goal operating; 4 = goal outcome; 5 = self-regulatory ability     |
| Inference coding for measure of self-regulatory outcome                                                 | 0 = goal specified; 1 = low inference; 2 = medium inference; 3 = high inference                              |
